# Supplementary material
Source: PubMed Central journal article supplement (PMC5869476)
Supplement: JB.00012-18_zjb999094693s1.pdf [file JB.00012-18_zjb999094693s1.pdf]

## Supplementary Information

### Nutritional Regulation of the Sae Two-Component System by CodY in

#### *Staphylococcus aureus*

Kevin D. Mlynek, William E. Sause, Derek E. Moormeier, Marat R. Sadykov, Kurt R. Hill, Kenneth W. Bayles, Victor J. Torres, and Shaun R. Brinsmade\*

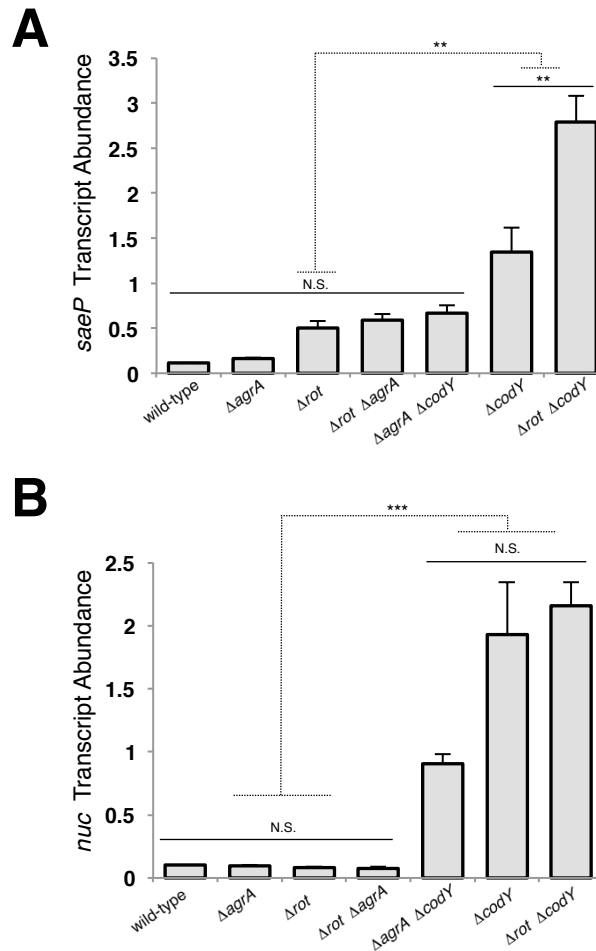

**Figure S1: CodY controls SaeR targets indirectly via *agr* and Rot in UAMS-1.**

Mean transcript abundances of (A) *saeP* and (B) *nuc* are shown for a suite of *agrA* mutants during exponential growth in TSB using qRT-PCR. Transcripts were normalized to *rpoC* transcript. Statistical significance for each condition was accessed using one-way ANOVA with Tukey's multiple comparison post test (\*\* $p < 0.01$ , \*\*\* $p < 0.001$ ). Error bars represent the standard error of the mean from at least two independent experiments. Error bars are plotted for all data; occasionally the error bars are too small to see.

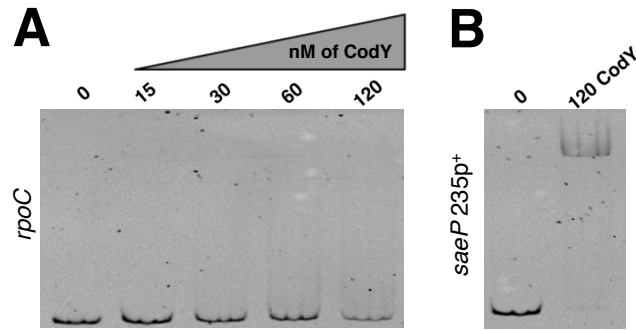

**Figure S2: CodY is unable to bind a DNA fragment lacking a definable binding motif.** (A) A 236-bp DNA fragment amplified from an internal portion of the *rpoC* gene (not differentially regulated by CodY) was incubated with increasing concentrations of CodY. (B) The *saeP235p*<sup>+</sup> fragment was used as a positive control on the same gel. The concentration (nM of monomer) used in each reaction is indicated above each lane. Gel images are representative of multiple experiments.

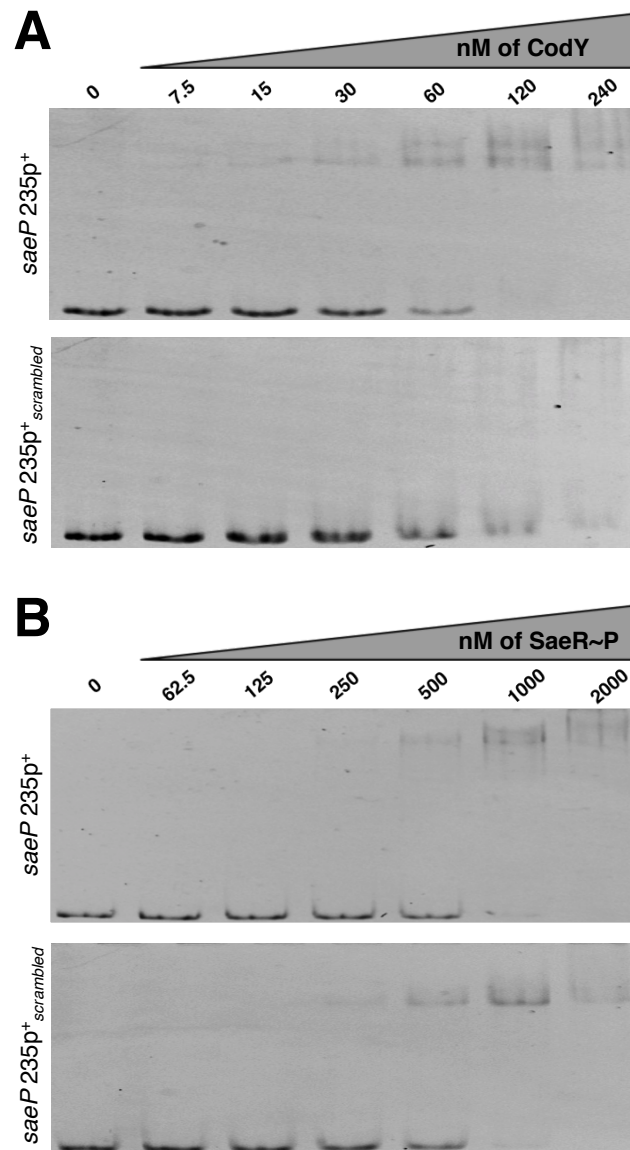

**Figure S3: Scrambling the CodY binding site in the SaeP upstream region significantly reduces interaction with CodY protein, but not the interaction with SaeR~P.** The wild-type *saeP235p*<sup>+</sup> fragment or a fragment with a scrambled CodY-binding site (*saeP235p*<sub>scrambled</sub>) was incubated with increasing concentrations of CodY (A) or SaeR~P (B). The concentration (nM of monomer) used in each reaction is indicated above each lane.

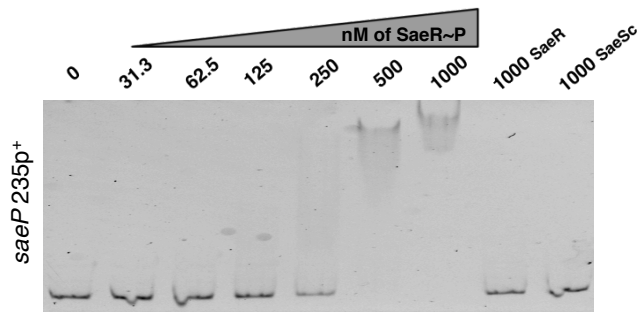

**Figure S4: SaeR requires phosphorylation to bind the *saeP235p<sup>+</sup>* fragment.** The wild-type *saeP235p<sup>+</sup>* fragment was incubated with increasing concentrations of SaeR~P. SaeR requires phosphorylation by SaeS to interact with DNA (1); control binding reactions containing only SaeR or SaeSC were set up in parallel to confirm interaction only with SaeR~P. The concentration (nM of monomer) used in each reaction is indicated above each lane.

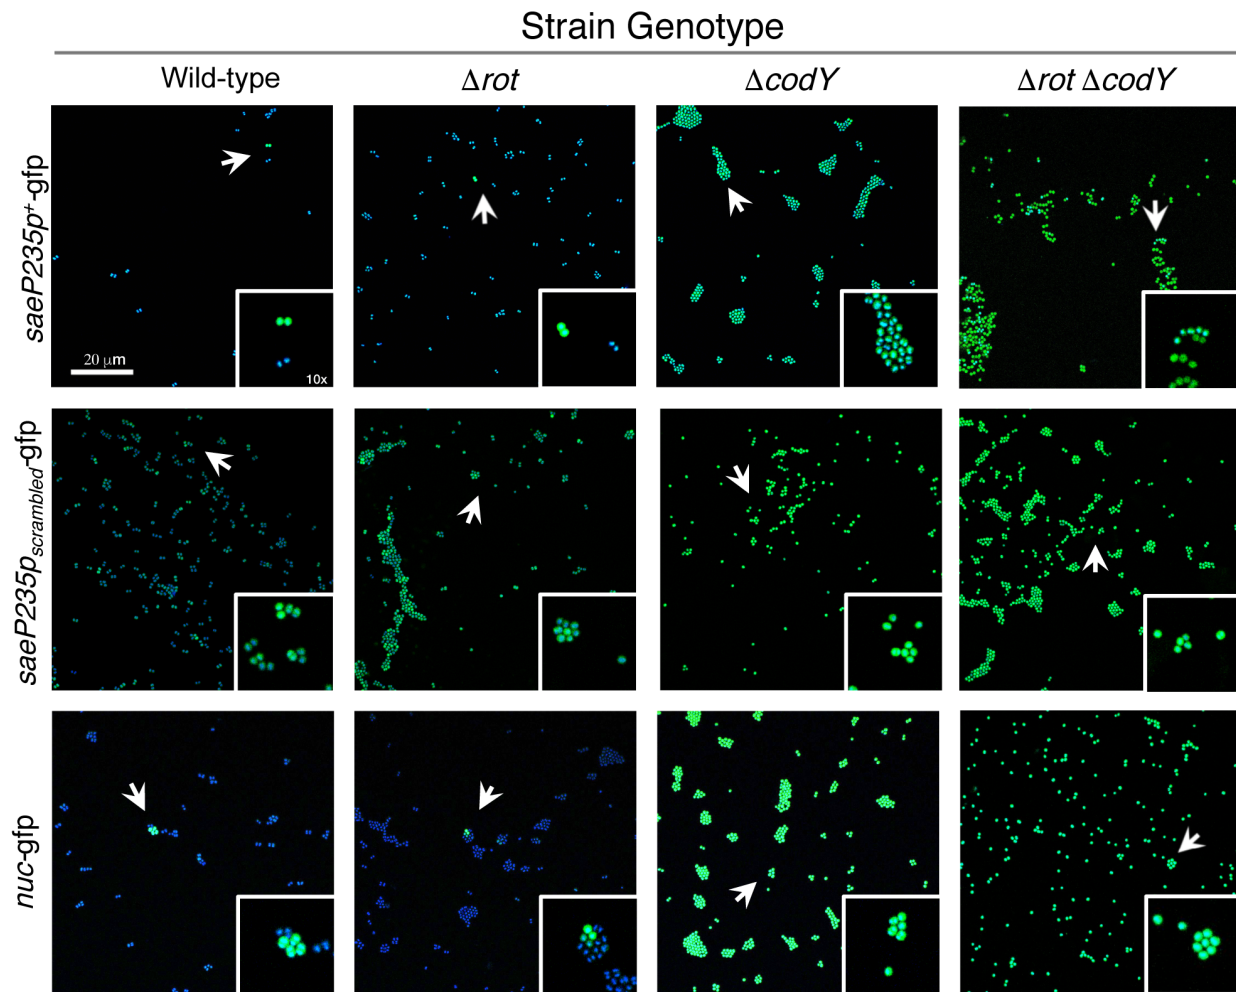

**Figure S5: Stochastic expression of SaeR targets is alleviated when *codY* is knocked out.** UAMS-1 cells harboring *gfp* reporter fusions were grown to exponential phase, fixed, and examined using fluorescent microscopy. GFP fluorescence, indicating promoter activity, is false-colored green. DAPI staining is used to visualize all cells and is false-colored blue. White arrows indicate regions magnified in inset images (10x). Images are representative of at least two independent experiments.

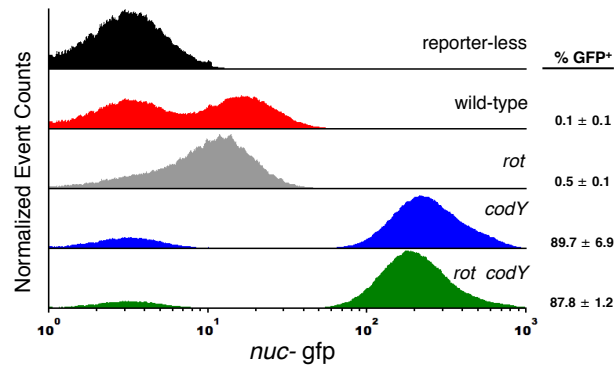

**Figure S6: The frequency of GFP<sup>+</sup> cells expressing the *nuc-gfp* fusion increases in the absence of CodY mediated repression.** Flow cytometry analysis of UAMS-1 cells carrying a *nuc-gfp* reporter fusion fixed in 4% PFA during exponential growth. Event counts were normalized after analyzing at least 30,000 cells. Percent of GFP<sup>+</sup> cells was determined using events that exceeded the maximal fluorescence of reporter-less cells. Histograms displayed are representative of two independent experiments.

**Table S1.** Bacterial strains used in this study.

| <b><i>S. aureus</i> strains</b> | <b>Relevant genotype or description</b>                                                                                                              | <b>Reference or source<sup>a</sup></b> |
|---------------------------------|------------------------------------------------------------------------------------------------------------------------------------------------------|----------------------------------------|
| RN4220                          | restriction deficient, highly transformable                                                                                                          | (2)                                    |
| PM783                           | $\Delta rot::Tn917$                                                                                                                                  | R. Procter                             |
| SRB337                          | USA200 MSSA UAMS-1                                                                                                                                   | (3)                                    |
| SRB372                          | SRB337 $\Delta codY::ermC$                                                                                                                           | (4)                                    |
| SRB872                          | SRB337 $\Delta rot::Tn917$                                                                                                                           |                                        |
| SRB899                          | SRB337 $\Delta codY::ermC \Delta rot::Tn917$                                                                                                         |                                        |
| SRB548                          | SRB337 $\Delta agrA$                                                                                                                                 |                                        |
| SRB549                          | SRB337 $\Delta agrA \Delta codY::ermC$                                                                                                               |                                        |
| SRB898                          | SRB337 $\Delta agrA \Delta rot::Tn917$                                                                                                               |                                        |
| SRB899                          | SRB337 $\Delta codY::ermC \Delta rot::Tn917$                                                                                                         |                                        |
| SRB687                          | USA300 LAC CA-MRSA Em <sup>S</sup>                                                                                                                   | A. Horswill                            |
| SRB746                          | SRB687 $\Delta codY::ermC$                                                                                                                           | (4)                                    |
| SRB858                          | SRB687 $\Delta rot::Tn917$                                                                                                                           |                                        |
| SRB865                          | SRB687 $\Delta codY::ermC \Delta rot::Tn917$                                                                                                         |                                        |
| SRB1008                         | SRB337/pKM11 <i>bla cat saeP235p<sup>+</sup>-gfp</i>                                                                                                 |                                        |
| SRB1009                         | SRB372/pKM11                                                                                                                                         |                                        |
| SRB1042                         | SRB872/pKM11                                                                                                                                         |                                        |
| SRB1043                         | SRB899/pKM11                                                                                                                                         |                                        |
| SRB1056                         | SRB337/pMRS-nuc <i>bla cat nuc-gfp</i>                                                                                                               |                                        |
| SRB1057                         | SRB372/pMRS-nuc                                                                                                                                      |                                        |
| SRB1159                         | SRB872/pMRS-nuc                                                                                                                                      |                                        |
| SRB1160                         | SRB899/pMRS-nuc                                                                                                                                      |                                        |
| SRB1162                         | SRB337/pKM14 <i>bla cat saeP235p<sub>scrambled</sub>-gfp</i>                                                                                         |                                        |
| SRB1163                         | SRB372/pKM14                                                                                                                                         |                                        |
| SRB1164                         | SRB872/pKM14                                                                                                                                         |                                        |
| SRB1165                         | SRB899/pKM14                                                                                                                                         |                                        |
| <b><i>E. coli</i> strains</b>   |                                                                                                                                                      |                                        |
| BL21 Star ( $\lambda$ DE3)      | F <sup>-</sup> <i>ompT hsdS<sub>B</sub> (r<sub>B</sub><sup>-</sup>, m<sub>B</sub><sup>-</sup>) gal dcm rne131</i> ( $\lambda$ DE3)                   | Novagen                                |
| NEB-5 $\alpha$                  | <i>fhuA2</i> $\Delta$ ( <i>argF-lacZ</i> )U169 <i>phoA glnV44</i> $\Phi$ 80 $\Delta$ ( <i>lacZ</i> )M15 <i>gyrA96 recA1 relA1 endA1 thi-1 hsdR17</i> | New England Biolabs                    |

<sup>a</sup> Unless noted otherwise strains were constructed during the course of this study.

**Table S2:** Primers used in this study<sup>a</sup>.

| Primer  | Sequence (5' to 3') <sup>b,c</sup>                                 | Purpose                                                              |
|---------|--------------------------------------------------------------------|----------------------------------------------------------------------|
| oKM026  | CGGCGCATGCAAGTGT <del>TTT</del> TATAGTGATA<br>AC                   | Construction of pKM11 ( <i>saeP235p<sup>+</sup>-gfp</i> )            |
| oSRB484 | GGGCATGCTAACTCCTCATTCTTCAAT<br>TTGAT                               | Construction of pKM11 ( <i>saeP235p<sup>+</sup>-gfp</i> )            |
| oKM062  | <i>GGCTACTTAAGTCCCTGCGTAAGGAGA</i><br>AAATAATTGTCTGATTTAAATAAATAGG | Construction of pKM15<br>( <i>saeP235p<sub>scrambled</sub>-gfp</i> ) |
| oKM063  | <i>TCCTTACGCAGGGACTTAAGTAGCCATT</i><br>AGTTAAGCGATATTTAAACGAAG     | Construction of pKM15<br>( <i>saeP235p<sub>scrambled</sub>-gfp</i> ) |
| oKM025  | 6-FAM/GGGCATGCTAACTCCTCATTCT                                       | 5'FAM labeled oSRB484 for EMSA                                       |
| oKM031  | 6-FAM/CGGCGCATGCAAGTGT <del>TTT</del> TATAG                        | 5'FAM labeled oKM026 for EMSA                                        |
| oKM027  | 6-FAM/CTTTCACGACGTACTTTAGA                                         | 5'FAM labeled oSRB240 for EMSA                                       |
| oKM048  | 5-MAXN/ <u>GGGCATGCTAACTCCTCATTCT</u><br>TTCAATTT                  | 5'MAX labeled oKM025 for DFACE                                       |
| oDS001  | CGAAAGAACAATACGCAAAGAGG                                            | qRT-PCR of <i>nuc</i>                                                |
| oDS002  | TGCATTTGCTGAGCTACTTAGA                                             | qRT-PCR of <i>nuc</i>                                                |
| oDS018  | CGGTGAAACTGTTGAAGGTAAAG                                            | qRT-PCR of <i>saeP</i>                                               |
| oDS019  | CGTAGTCAACCATTGCGATTTTC                                            | qRT-PCR of <i>saeP</i>                                               |
| oSRB239 | GGATTGGCTTCACCTGAA AA                                              | qRT-PCR of <i>rpoC</i>                                               |
| oSRB240 | CTTTCACGACGTACTTTAGA                                               | qRT-PCR of <i>rpoC</i>                                               |
| oKM1    | GCATTGAGCTCAAAGGAGAAAAATTCAT<br>GAGC                               | Construction of SaCodY-His <sub>6</sub> in pBAD30                    |
| oSRB410 | ATGATGATGGCCCTGAAAATACAGGTTT<br>TCCTTACTTTTTTCTAATTCATCT           | Construction of SaCodY-His <sub>6</sub> in pBAD30                    |
| oSRB411 | AGCTTGCATGCTTAATGATGATGATGAT<br>GATGGCCCTGAAAATACAGGTTTTTC         | Construction of SaCodY-His <sub>6</sub> in pBAD30                    |

<sup>a</sup> All primers used in this study were designed using UAMS-1 as the reference genome.

<sup>b</sup> Underline denotes the presence of a restriction site for cloning into pMRSI.

<sup>c</sup> Italics denotes complementary sequences for use in overlapping PCR.



**Table S3:** Plasmids used in this study.

| Plasmid   | Relevant Genotype                                                                                                       | Reference or source <sup>a</sup> |
|-----------|-------------------------------------------------------------------------------------------------------------------------|----------------------------------|
| pMRSI     | sGFP-sDsRed double reporter shuttle vector (Ap <sup>R</sup> , Cm <sup>R</sup> )                                         | (4)                              |
| pMRSI-nuc | pMRSI with 382 bp upstream of <i>nuc</i> fused to sGFP ( <i>nuc-gfp</i> ) (Ap <sup>R</sup> , Cm <sup>R</sup> )          | (4)                              |
| pKM11     | pMRSI with 235 bp upstream of <i>saeP</i> fused to sGFP ( <i>saeP235-gfp</i> ) (Ap <sup>R</sup> , Cm <sup>R</sup> )     |                                  |
| pKM14     | pKM11 with scrambled CodY binding motif ( <i>saeP235<sub>scrambled</sub>-gfp</i> ) (Ap <sup>R</sup> , Cm <sup>R</sup> ) |                                  |
| pSRB81    | Overproduction plasmid for SaCodY-His <sub>6</sub> protein (Ap <sup>R</sup> )                                           |                                  |
| pET284    | Overproduction plasmid for SaSaeR-His <sub>6</sub> protein (Ap <sup>R</sup> )                                           | (1)                              |
| pMCS619   | Overproduction plasmid for SaSaeSc-His <sub>6</sub> protein (Ap <sup>R</sup> )                                          | (1)                              |
| pRK1037   | Produces TVMV protease for controlled intracellular processing of fusion proteins (Km <sup>R</sup> )                    | Science Reagents, Inc.           |
| pBAD30    | Plasmid with P <sub>araBAD</sub> for arabinose-inducible expression (Ap <sup>R</sup> )                                  | (5)                              |

<sup>a</sup> Unless otherwise noted all plasmids were engineered during this study.

## References

1. **Sun F, Li C, Jeong D, Sohn C, He C, Bae T.** 2010. In the *Staphylococcus aureus* two-component system *sae*, the response regulator SaeR binds to a direct repeat sequence and DNA binding requires phosphorylation by the sensor kinase SaeS. *J Bacteriol* **192**:2111-2127.
2. **Schenk S, Laddaga RA.** 1992. Improved method for electroporation of *Staphylococcus aureus*. *FEMS Microbiol Lett* **73**:133-138.
3. **Gillaspy AF, Hickmon SG, Skinner RA, Thomas JR, Nelson CL, Smeltzer MS.** 1995. Role of the accessory gene regulator (*agr*) in pathogenesis of staphylococcal osteomyelitis. *Infect Immun* **63**:3373-3380.
4. **Waters NR, Samuels DJ, Behera RK, Livny J, Rhee KY, Sadykov MR, Brinsmade SR.** 2016. A Spectrum of CodY Activities Drives Metabolic Reorganization and Virulence Gene Expression in *Staphylococcus aureus*. *Mol Microbiol* **101**:495-514.
5. **Guzman L-M, Belin D, Carson MJ, Beckwith J.** 1995. Tight regulation, modulation, and high-level expression by vectors containing arabinose P<sub>BAD</sub> promoter. *J Bacteriol* **177**:4121-4130.
